# Supplementary material
Source: PubMed Central journal article supplement (PMC5556680)
Supplement: NIHMS888715-supplement-supplement_1.pdf [file NIHMS888715-supplement-supplement_1.pdf]

**Supplemental table 1 Pooled hazard ratios (95% CI) for incident RA according to cumulative AHEI-2010 individual component score quartile for women aged over 55 years in Nurses' Health Study (NHS, 1984-2012) and Nurses' Health Study II (NHS II, 1991-2013)\***

|                                                    | AHEI-2010                        |                    |                    |                    | <i>p</i> for trend <sup>§</sup> |
|----------------------------------------------------|----------------------------------|--------------------|--------------------|--------------------|---------------------------------|
|                                                    | Q1                               | Q2                 | Q3                 | Q4                 |                                 |
|                                                    | <i>Red/processed meat</i>        |                    |                    |                    |                                 |
| Median, servings/d                                 | 1.40                             | 1.02               | 0.73               | 0.41               |                                 |
| Cases/ Person-years                                | 129/395,122                      | 132/402,410        | 152/416,676        | 149/440,992        |                                 |
| Age adjusted model 1                               | 1.00                             | 1.11(0.88 to 1.41) | 1.20(0.95 to 1.52) | 1.12(0.88 to 1.43) | 0.28                            |
| Multivariable-adjusted model 2 (main) <sup>†</sup> | 1.00                             | 1.15(0.90 to 1.47) | 1.26(0.98 to 1.62) | 1.21(0.93 to 1.58) | 0.12                            |
| Multivariable-adjusted model 3 <sup>‡</sup>        | 1.00                             | 1.15(0.90 to 1.47) | 1.27(0.99 to 1.63) | 1.24(0.95 to 1.62) | 0.09                            |
|                                                    | <i>Sugar-sweetened beverages</i> |                    |                    |                    |                                 |
| Median, servings/d                                 | 1.00                             | 0.84               | 0.57               | 0.21               |                                 |
| Cases/ Person-years                                | 150/431,302                      | 144/394,943        | 135/410,923        | 133/418,032        |                                 |
| Age adjusted model 1                               | 1.00                             | 0.98(0.78 to 1.24) | 0.91(0.72 to 1.15) | 0.88(0.69 to 1.11) | 0.22                            |
| Multivariable-adjusted model 2 (main) <sup>†</sup> | 1.00                             | 0.96(0.76 to 1.22) | 0.89(0.70 to 1.13) | 0.85(0.66 to 1.09) | 0.17                            |
| Multivariable-adjusted model 3 <sup>‡</sup>        | 1.00                             | 0.96(0.76 to 1.21) | 0.88(0.70 to 1.12) | 0.84(0.66 to 1.08) | 0.15                            |
|                                                    | <i>Trans fat</i>                 |                    |                    |                    |                                 |
| Median, % of total energy                          | 2.0                              | 1.6                | 1.3                | 1.0                |                                 |
| Cases/ Person-years                                | 115/391,666                      | 143/402,685        | 162/416,623        | 142/444,226        |                                 |
| Age adjusted model 1                               | 1.00                             | 1.22(0.96 to 1.55) | 1.32(1.04 to 1.67) | 1.10(0.86 to 1.41) | 0.31                            |
| Multivariable-adjusted model 2 (main) <sup>†</sup> | 1.00                             | 1.21(0.95 to 1.54) | 1.30(1.02 to 1.65) | 1.09(0.85 to 1.40) | 0.35                            |
| Multivariable-adjusted model 3 <sup>‡</sup>        | 1.00                             | 1.21(0.95 to 1.54) | 1.30(1.02 to 1.65) | 1.10(0.86 to 1.42) | 0.31                            |
|                                                    | <i>Sodium<sup>¶</sup></i>        |                    |                    |                    |                                 |
| Cases/ Person-years                                | 137/397,542                      | 143/391,092        | 137/431,282        | 145/435,284        |                                 |
| Age adjusted model 1                               | 1.00                             | 1.09(0.86 to 1.36) | 0.91(0.71 to 1.16) | 1.01(0.80 to 1.28) | 0.73                            |
| Multivariable-adjusted model 2 (main) <sup>†</sup> | 1.00                             | 1.12(0.86 to 1.46) | 0.93(0.68 to 1.27) | 1.11(0.77 to 1.58) | 0.81                            |
| Multivariable-adjusted model 3 <sup>‡</sup>        | 1.00                             | 1.13(0.87 to 1.47) | 0.94(0.68 to 1.29) | 1.13(0.79 to 1.62) | 0.71                            |
|                                                    | <i>Nuts</i>                      |                    |                    |                    |                                 |
| Median, servings/d                                 | 0.09                             | 0.21               | 0.35               | 0.41               |                                 |

|                                                    |             |                    |                    |                    |      |
|----------------------------------------------------|-------------|--------------------|--------------------|--------------------|------|
| Cases/ Person-years                                | 145/403,066 | 131/410,668        | 132/411,219        | 154/430,247        |      |
| Age adjusted model 1                               | 1.00        | 0.86(0.68 to 1.09) | 0.88(0.69 to 1.11) | 1.02(0.81 to 1.28) | 0.63 |
| Multivariable-adjusted model 2 (main) <sup>†</sup> | 1.00        | 0.84(0.66 to 1.07) | 0.85(0.67 to 1.09) | 0.98(0.77 to 1.26) | 0.82 |
| Multivariable-adjusted model 3 <sup>‡</sup>        | 1.00        | 0.84(0.66 to 1.07) | 0.85(0.67 to 1.09) | 0.99(0.77 to 1.27) | 0.76 |
| Vegetables                                         |             |                    |                    |                    |      |
| Median, servings/d                                 | 1.8         | 2.7                | 3.5                | 4.4                |      |
| Cases/ Person-years                                | 122/393,101 | 141/406,144        | 151/419,624        | 148/436,332        |      |
| Age adjusted model 1                               | 1.00        | 1.17(0.92 to 1.49) | 1.15(0.91 to 1.46) | 1.13(0.89 to 1.44) | 0.38 |
| Multivariable-adjusted model 2 (main) <sup>†</sup> | 1.00        | 1.16(0.91 to 1.47) | 1.13(0.88 to 1.45) | 1.11(0.85 to 1.44) | 0.52 |
| Multivariable-adjusted model 3 <sup>‡</sup>        | 1.00        | 1.15(0.90 to 1.47) | 1.13(0.88 to 1.45) | 1.10(0.85 to 1.43) | 0.54 |
| Fruits                                             |             |                    |                    |                    |      |
| Median, servings/d                                 | 0.6         | 1.2                | 1.7                | 2.5                |      |
| Cases/ Person-years                                | 113/379,450 | 145/402,031        | 163/424,501        | 141/449,219        |      |
| Age adjusted model 1                               | 1.00        | 1.15(0.90 to 1.46) | 1.34(1.06 to 1.69) | 1.03(0.80 to 1.32) | 0.72 |
| Multivariable-adjusted model 2 (main) <sup>†</sup> | 1.00        | 1.18(0.92 to 1.50) | 1.38(1.09 to 1.76) | 1.07(0.82 to 1.40) | 0.56 |
| Multivariable-adjusted model 3 <sup>‡</sup>        | 1.00        | 1.17(0.92 to 1.50) | 1.38(1.09 to 1.76) | 1.07(0.82 to 1.40) | 0.55 |
| Poly-unsaturated fat                               |             |                    |                    |                    |      |
| Median, % of total energy                          | 4.6         | 5.5                | 6.2                | 7.2                |      |
| Cases/ Person-years                                | 145/418,468 | 153/409,983        | 126/411,349        | 138/415,400        |      |
| Age adjusted model 1                               | 1.00        | 1.06(0.85 to 1.34) | 0.84(0.66 to 1.08) | 0.97(0.76 to 1.22) | 0.45 |
| Multivariable-adjusted model 2 (main) <sup>†</sup> | 1.00        | 1.05(0.84 to 1.33) | 0.83(0.65 to 1.06) | 0.94(0.75 to 1.19) | 0.34 |
| Multivariable-adjusted model 3 <sup>‡</sup>        | 1.00        | 1.05(0.83 to 1.32) | 0.83(0.65 to 1.05) | 0.94(0.74 to 1.19) | 0.33 |
| Alcohol <sup>¶</sup>                               |             |                    |                    |                    |      |
| Range, drinks/d                                    | 0           | 2.0-2.5            | 1.5-2.0            | 0.5-1.5            |      |
| Cases/ Person-years                                | 143/459,490 | 124/356,304        | 161/423,264        | 134/416,143        |      |
| Age adjusted model 1                               | 1.00        | 1.18(0.92 to 1.50) | 1.21(0.96 to 1.52) | 1.05(0.83 to 1.34) | 0.94 |
| Multivariable-adjusted model 2 (main) <sup>†</sup> | 1.00        | 1.13(0.88 to 1.44) | 1.13(0.90 to 1.43) | 0.95(0.75 to 1.21) | 0.45 |
| Multivariable-adjusted model 3 <sup>‡</sup>        | 1.00        | 1.12(0.88 to 1.43) | 1.13(0.90 to 1.43) | 0.96(0.75 to 1.22) | 0.50 |
| Whole grain                                        |             |                    |                    |                    |      |

|                                                    |             |                    |                    |                    |      |
|----------------------------------------------------|-------------|--------------------|--------------------|--------------------|------|
| Median, g/d                                        | 7.7         | 15.9               | 23.2               | 35.2               |      |
| Cases/ Person-years                                | 134/392,219 | 130/400,942        | 147/417,116        | 151/444,923        |      |
| Age adjusted model 1                               | 1.00        | 0.91(0.72 to 1.15) | 0.88(0.70 to 1.12) | 1.01(0.80 to 1.28) | 0.89 |
| Multivariable-adjusted model 2 (main) <sup>†</sup> | 1.00        | 0.91(0.72 to 1.15) | 0.90(0.70 to 1.14) | 1.04(0.82 to 1.33) | 0.68 |
| Multivariable-adjusted model 3 <sup>‡</sup>        | 1.00        | 0.91(0.72 to 1.15) | 0.90(0.70 to 1.14) | 1.05(0.82 to 1.34) | 0.62 |
| Long-chain (n-3) fats (EPA+DHA)                    |             |                    |                    |                    |      |
| Median, mg/d                                       | 80.0        | 142.5              | 193.3              | 247.5              |      |
| Cases/ Person-years                                | 117/395,020 | 135/407,943        | 143/414,910        | 167/437,327        |      |
| Age adjusted model 1                               | 1.00        | 1.08(0.84 to 1.38) | 1.20(0.95 to 1.53) | 1.22(0.96 to 1.54) | 0.07 |
| Multivariable-adjusted model 2 (main) <sup>†</sup> | 1.00        | 1.06(0.83 to 1.36) | 1.18(0.93 to 1.50) | 1.18(0.93 to 1.51) | 0.13 |
| Multivariable-adjusted model 3 <sup>‡</sup>        | 1.00        | 1.06(0.83 to 1.36) | 1.17(0.92 to 1.50) | 1.18(0.93 to 1.51) | 0.13 |

Hazard ratios were calculated by using time-varying Cox proportional hazards models

\* The AHEI-2010 score is reversely coded for red meat, sugar-sweetened beverages, Trans fat and sodium: higher score means lower intake.

The AHEI-2010 score is directly coded for nuts, vegetables, fruits, poly-unsaturated fat, alcohol, whole grain and long-chain (n-3) fats: higher score means higher intake

<sup>†</sup>Adjustment for age, cohort, smoking (never, past, current 1-14 cigarettes/d, current  $\geq 15$  cigarettes/d), age at menarche (<12, 12, >12 years), parity and breast feeding (nulliparous, parous/no breastfeeding, parous/1–12 months breastfeeding, parous/ >12 months breastfeeding), hormone use (pre-menopausal, post-menopausal with never use, current use and past use) and total energy (quintiles)

<sup>‡</sup>Additional adjustment for BMI (<20, 20-22.9, 23-24.9, 25-29.9,  $\geq 30$ kg/m<sup>2</sup>)

<sup>§</sup>*p* for trend was derived from tests of linear trend across categories of AHEI scores by treating the median value of each category as a continuous variable

<sup>¶</sup>Sodium score was derived according to an empirical quintile cutoff in the repeated dietary assessment, so the unit was not available

Alcohol score was derived using pre-specified cutoff, so only range was available
